# Supplementary material
Source: publisher figshare collection journal article supplement (https://tandf.figshare.com/articles/dataset/_/7468505)
Supplement: Supplementary file 1 [file 2]

**Online Supplement - Table 2.** Characteristics of cancer patients receiving myelosuppressive chemotherapy from 2010-2016, by receipt of CSF prophylaxis in first cycle

|                                                               | Receipt of Prophylaxis |                 |                 |
|---------------------------------------------------------------|------------------------|-----------------|-----------------|
|                                                               | Overall                | Yes             | No              |
|                                                               | (n=142,730)            | (n=82,547)      | (n=60,183)      |
| Patient                                                       |                        |                 |                 |
| Age (years), mean (SD)                                        | 55.7 (10.8)            | 55.1 (10.8)     | 56.4 (10.7)     |
| Male, %                                                       | 7.6%                   | 4.4%            | 12.0%           |
| Chronic Comorbidities, %                                      |                        |                 |                 |
| Cardiovascular Disease                                        | 12.1%                  | 10.4%           | 14.4%           |
| Diabetes                                                      | 13.0%                  | 11.9%           | 14.5%           |
| Liver Disease                                                 | 4.9%                   | 4.2%            | 5.9%            |
| Lung Disease                                                  | 11.2%                  | 10.0%           | 12.8%           |
| Osteoarthritis                                                | 9.2%                   | 9.2%            | 9.1%            |
| Renal Disease                                                 | 3.1%                   | 2.7%            | 3.6%            |
| Rheumatoid Disease                                            | 1.5%                   | 1.5%            | 1.4%            |
| Thyroid Disease                                               | 13.2%                  | 13.6%           | 12.5%           |
| Body Weight and Nutritional Status, %                         |                        |                 |                 |
| Obesity                                                       | 10.1%                  | 8.9%            | 11.7%           |
| Malnutrition                                                  | 1.4%                   | 0.9%            | 2.1%            |
| Proxies for Health Status, %                                  |                        |                 |                 |
| Hospice Care                                                  | 0.3%                   | 0.3%            | 0.3%            |
| SNF                                                           | 1.0%                   | 0.7%            | 1.3%            |
| Hospice or SNF                                                | 1.3%                   | 1.0%            | 1.7%            |
| Proxies for Physical Function, %                              |                        |                 |                 |
| Use of Hospital Bed                                           | 0.3%                   | 0.2%            | 0.3%            |
| Use of Supplemental Oxygen                                    | 2.7%                   | 2.2%            | 3.4%            |
| Use of Walking Aid                                            | 1.8%                   | 1.5%            | 2.1%            |
| Use of Wheel Chair                                            | 0.4%                   | 0.3%            | 0.5%            |
| Hx of Other Conditions/Events Prior to Chemotherapy Course, % |                        |                 |                 |
| Anemia                                                        | 18.7%                  | 14.5%           | 24.6%           |
| Neutropenia                                                   | 2.6%                   | 3.5%            | 1.3%            |
| Infection                                                     | 52.5%                  | 53.3%           | 51.5%           |
| Recent Surgery                                                | 84.5%                  | 83.3%           | 86.1%           |
| Hospitalization for Any Reason                                | 41.3%                  | 31.5%           | 54.8%           |
| Chemotherapy                                                  | 3.9%                   | 4.2%            | 3.5%            |
| Radiation Therapy                                             | 8.4%                   | 5.9%            | 11.8%           |
| Pre-Chemotherapy Expenditure (\$), mean (SD)                  | 40,869 (35,361)        | 38,118 (32,168) | 44,627 (38,959) |
| Cancer-Chemotherapy                                           |                        |                 |                 |
| Regimen, %                                                    |                        |                 |                 |
| Non-metastatic breast: TC                                     | 23.1%                  | 24.5%           | 21.0%           |
| Non-metastatic breast: TAC                                    | 3.9%                   | 6.1%            | 1.0%            |
| Non-metastatic breast: TCH                                    | 10.3%                  | 11.2%           | 9.0%            |
| Non-metastatic breast: dose-dense AC/AC-T                     | 23.7%                  | 36.1%           | 6.6%            |
| Non-metastatic colorectal: FOLFOX                             | 13.9%                  | 2.5%            | 29.6%           |
| Non-metastatic lung: CAR + PAC                                | 4.6%                   | 2.2%            | 7.9%            |
| NHL: CHOP                                                     | 1.6%                   | 1.8%            | 1.3%            |
| NHL: CHOP-R                                                   | 9.3%                   | 11.2%           | 6.8%            |
| Non-metastatic ovarian: CAR + PAC                             | 9.6%                   | 4.3%            | 16.9%           |
