# Supplementary material
Source: publisher figshare collection journal article supplement (https://tandf.figshare.com/articles/dataset/_/7468505)
Supplement: Supplementary file 2 [file 2]

**Online Supplement - Table 1.** Selection of source and study populations

| Inclusion/Exclusion Criteria                                                   | Total Population |        |
|--------------------------------------------------------------------------------|------------------|--------|
|                                                                                | n                | %      |
| Source Population                                                              |                  |        |
| Receipt of chemotherapy with myelosuppressive regimen from 1/2010 thru 12/2016 | 894,205          | 100.0% |
| Continuously enrolled for ≥6 months prior to initiation of chemotherapy        | 703,331          | 78.7%  |
| Aged ≥18 years                                                                 | 686,615          | 76.8%  |
| Evidence of single non-metastatic solid cancer or NHL                          | 369,215          | 41.3%  |
| No stem cell/bone marrow transplantation                                       | 361,526          | 40.4%  |
| Study Population                                                               |                  |        |
| Receipt of intermediate/high-risk chemotherapy regimen for cancer of interest  | 142,730          | 100.0% |
| Non-metastatic breast: TC, TAC, TCH, dose-dense AC/AC-T                        | 87,003           | 61.0%  |
| Non-metastatic colorectal: FOLFOX                                              | 19,816           | 13.9%  |
| Non-metastatic lung: carboplatin + paclitaxel                                  | 6,589            | 4.6%   |
| NHL: CHOP/CHOP-R                                                               | 15,620           | 10.9%  |
| Non-metastatic ovarian: carboplatin + paclitaxel                               | 13,702           | 9.6%   |
| Study Population, by Calendar Quarter of Chemotherapy                          |                  |        |
| Overall                                                                        | 142,730          | 100.0% |
| 2010                                                                           |                  |        |
| Q1                                                                             | 5,721            | 4.0%   |
| Q2                                                                             | 5,570            | 3.9%   |
| Q3                                                                             | 6,271            | 4.4%   |
| Q4                                                                             | 5,727            | 4.0%   |
| 2011                                                                           |                  |        |
| Q1                                                                             | 5,990            | 4.2%   |
| Q2                                                                             | 5,436            | 3.8%   |
| Q3                                                                             | 6,511            | 4.6%   |
| Q4                                                                             | 6,279            | 4.4%   |
| 2012                                                                           |                  |        |
| Q1                                                                             | 6,497            | 4.6%   |
| Q2                                                                             | 6,053            | 4.2%   |
| Q3                                                                             | 6,109            | 4.3%   |
| Q4                                                                             | 6,258            | 4.4%   |
| 2013                                                                           |                  |        |
| Q1                                                                             | 5,399            | 3.8%   |
| Q2                                                                             | 5,248            | 3.7%   |
| Q3                                                                             | 5,685            | 4.0%   |
| Q4                                                                             | 5,489            | 3.8%   |
| 2014                                                                           |                  |        |
| Q1                                                                             | 5,201            | 3.6%   |
| Q2                                                                             | 4,691            | 3.3%   |
| Q3                                                                             | 5,287            | 3.7%   |
| Q4                                                                             | 4,970            | 3.5%   |
| 2015                                                                           |                  |        |
| Q1                                                                             | 3,874            | 2.7%   |
| Q2                                                                             | 3,635            | 2.5%   |
| Q3                                                                             | 3,768            | 2.6%   |
| Q4                                                                             | 3,604            | 2.5%   |
| 2016                                                                           |                  |        |
| Q1                                                                             | 3,503            | 2.5%   |
| Q2                                                                             | 3,299            | 2.3%   |
| Q3                                                                             | 3,504            | 2.5%   |
| Q4                                                                             | 3,151            | 2.2%   |
