# Supplementary material
Source: publisher figshare collection journal article supplement (https://tandf.figshare.com/articles/dataset/_/7468505)
Supplement: Supplementary file 3 [file 2]

Archive with 3 entries (3 files):
- icmo_a_1558851_sm4313.pdf
- icmo_a_1558851_sm4311.pdf
- icmo_a_1558851_sm4310.doc
